# Supplementary material for: Top 10 (plus 1) research priorities for expectant families and those with children to age 24 months in Alberta, Canada: results from the Family Research Agenda Initiative Setting (FRAISE) priority setting partnership project
Source: PubMed Central journal article supplement — BMJ Open. 2021 Dec 9;11(12):e047919. doi: 10.1136/bmjopen-2020-047919 (PMC8663105; doi:10.1136/bmjopen-2020-047919), 2021-12-09
Supplement: bmjopen-2020-047919supp001.pdf [file bmjopen-2020-047919supp001.pdf]

| <b>Supplemental Table. Top 34 Themes</b>                                                                                                                                                                        |                             |
|-----------------------------------------------------------------------------------------------------------------------------------------------------------------------------------------------------------------|-----------------------------|
| <b>Question</b>                                                                                                                                                                                                 | <b># of times in top 10</b> |
| How can families and caregivers of children 2 and under be supported to develop healthy coping strategies, emotional regulation, and resiliency in both themselves and their children?                          | 15                          |
| How to access information/programs and navigate the healthcare system when you are from a minority/non-dominant group?                                                                                          | 14                          |
| What is an age appropriate level of risk taking for children to promote their growth & development while maintaining adequate (good enough) safety?                                                             | 12                          |
| How do parents manage multiple sources of information to make health decisions that are tailored to their specific circumstances and needs?                                                                     | 12                          |
| How can families (partners & extended family members), communities, and government encourage self-care and provide emotional and practical support for parents during the perinatal and early childhood period? | 11                          |
| When things don't go as planned, how can parents get care, support, and information during pregnancy, labour, birth or the postpartum period?                                                                   | 11                          |
| What formats (i.e. in-person, online, group) do families prefer when accessing supports and services to develop and sustain healthy relationships and mental well-being?                                        | 10                          |
| How can health care professionals provide a safe and trusting environment that encourages women/families to disclose mental health concerns without fear of negative repercussions?                             | 10                          |
| How to identify, prevent, and treat eczema, asthma, and allergies?                                                                                                                                              | 10                          |
| How do we create culturally appropriate, family specific information about sleep (co-sleeping, swaddling, sleep training, etc.) from conception to age 2?                                                       | 10                          |
| What are the advantages and disadvantages of using a trauma-informed model of care to explore pregnancy, childbirth, and postpartum for all parents?                                                            | 9                           |
| How do we prevent, assess, and treat sleep problems in parents and children?                                                                                                                                    | 9                           |
| What supports and services are required to support families to develop and sustain healthy relationships and mental wellbeing?                                                                                  | 8                           |
| To minimize physician visits, what user centred information sources and formats are most acceptable and effective to provide parents and healthcare providers with reliable and up-to-date information?         | 8                           |
| How can we best support families with their infant feeding decisions?                                                                                                                                           | 7                           |
| With increasing vaccine hesitancy, how do we best protect individual and population health?                                                                                                                     | 7                           |
| How can families during the perinatal and early childhood period access appropriate and evidence-based assessments, prevention, treatment, and support for mental health concerns?                              | 7                           |
| How can we manage the effect of exposure to cannabis smoking to families with young children?                                                                                                                   | 7                           |
| In children 2 and under, how can families and caregivers be supported around milestones, behaviours, and signs of delay?                                                                                        | 7                           |
| In addition to vaccination, how can parents and children build their immunity?                                                                                                                                  | 6                           |
| What supports and services increase general parental confidence?                                                                                                                                                | 6                           |
| How can families during the perinatal and early childhood period manage emotional and physical wellbeing?                                                                                                       | 6                           |
| What are the necessary measures to increase safety for toddlers/children in an ever changing social and physical environment (during the early childhood period)?                                               | 6                           |
| How can communities and health care professionals provide culturally sensitive best practices for promoting healthy pregnancies & fetal/infant/child development?                                               | 6                           |
| How can we increase awareness and access to additional services and resources for families of young children?                                                                                                   | 6                           |
| What are expected and problematic sleep patterns in caregivers, infants, and toddlers?                                                                                                                          | 6                           |

|                                                                                                                                                                             |   |
|-----------------------------------------------------------------------------------------------------------------------------------------------------------------------------|---|
| What evidence-based community resources and services are available to help foster healthy relationships for expecting parents?                                              | 5 |
| How can families be supported to identify the right fit of childcare, looking at quality, safety, and affordability while still incorporating their own beliefs and values? | 5 |
| How do we build on general confidence to generate transferable skills for parenting?                                                                                        | 4 |
| What are the consequences of sleep deprivation and problems in parents and children?                                                                                        | 4 |
| What are effective strategies for accessing/using my electronic health record and keeping track of my family's health information?                                          | 3 |
| What should healthcare providers recommend for guidelines to support families to transition from milk feeding to solid foods?                                               | 2 |
| How does infant feeding impact allergies?                                                                                                                                   | 2 |
| How can parents during early childhood identify & prevent child safety risks?                                                                                               | 2 |
